# Supplementary material for: A flexible and high-performance all-solid-state supercapacitor device based on Ni3S2 nanosheets coated ITO nanowire arrays on carbon fabrics
Source: Royal Society of Chemistry journal article supplement (doi:10.1039/c6ra14174a), 2016-01-01
Supplement: c6ra14174a1.pdf [file c6ra14174a1.pdf]

## Supplementary Information

### A Flexible and High-Performance All-solid-state Supercapacitor Device Based on $\text{Ni}_3\text{S}_2$ Nanosheets Coated ITO Nanowire Arrays on Carbon Fabrics

Jie Yang,<sup>ab‡</sup> Chun Fang,<sup>be‡</sup> Chunxiong Bao,<sup>ab</sup> Weiwei Yang,<sup>be</sup> Tao Yu,<sup>\*abc</sup> Weidong Zhu,<sup>ab</sup> Faming Li,<sup>ab</sup> Jianguo Liu,<sup>\*de</sup> Zhigang Zou<sup>abcd</sup>

<sup>a</sup>National Laboratory of Solid State Microstructures, Nanjing University, Nanjing 210093, P.R.China

<sup>b</sup>Ecomaterials and Renewable Energy Research Center (ERERC) at Department of Physics, Nanjing University, Nanjing 210093, P.R.China

<sup>c</sup>Collaborative Innovation Center of Advanced Microstructures, Nanjing University, Nanjing 210093, P.R.China

<sup>d</sup>College of Engineering and Applied Science, Nanjing University, Nanjing 210093, P.R.China

<sup>e</sup> Kunshan Sunlaite New Energy Co., Ltd., Kunshan, 1699 South Zuchongzhi Road, Suzhou, 215347, China

<sup>‡</sup> They contribute this work equally.

\*Address correspondence to [yutao@nju.edu.cn](mailto:yutao@nju.edu.cn) or [jianguoliu@nju.edu.cn](mailto:jianguoliu@nju.edu.cn)

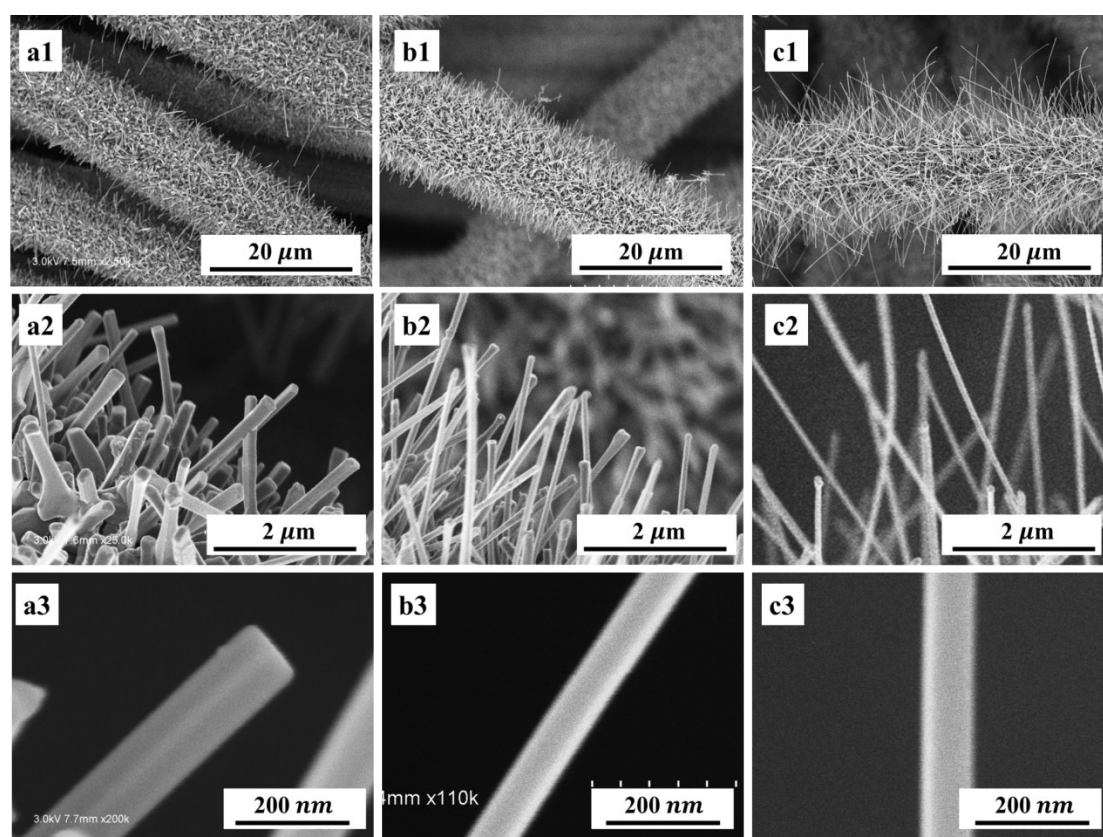

**Fig. S1** SEM images of L1 (a1, a2, a3), L2 (b1, b2, b3), L3 (c1, c2, c3) in three different magnifications.

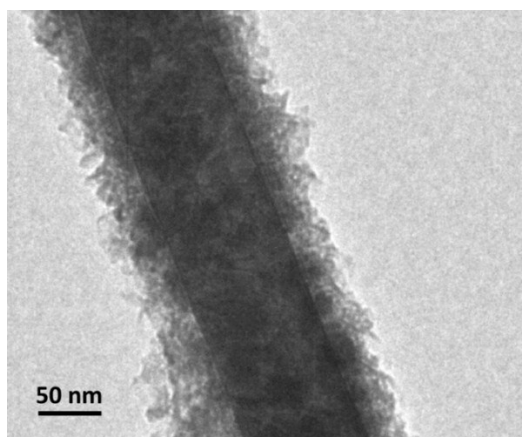

Fig. S2 The HR-TEM of the  $\text{Ni}_3\text{S}_2$  coated ITO nanowires.

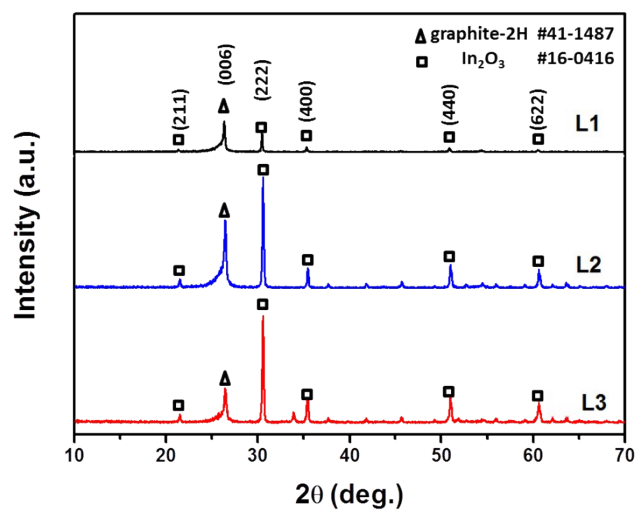

Fig. S3 XRD patterns of L1, L2, L3.

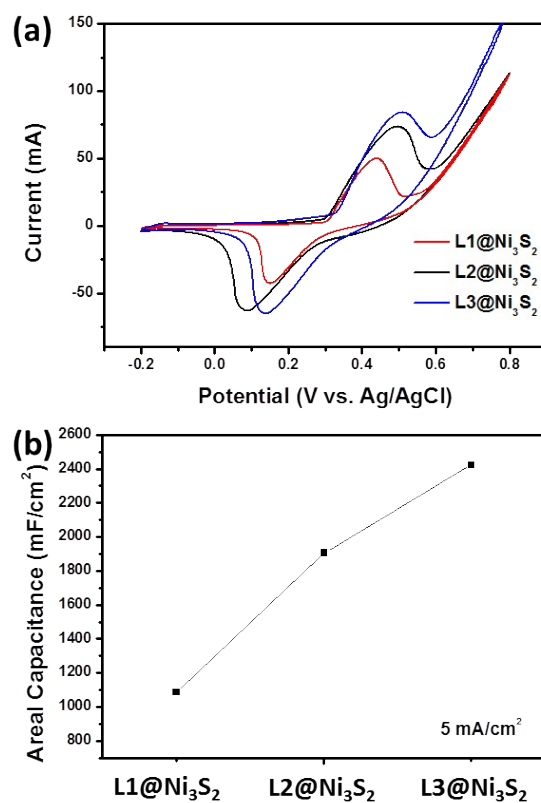

**Fig. S4** (a) CV curves of L1@Ni<sub>3</sub>S<sub>2</sub>, L2@Ni<sub>3</sub>S<sub>2</sub> and L3@Ni<sub>3</sub>S<sub>2</sub> with the scan rate of 10mV s<sup>-1</sup>. (b) The areal capacitances of L1@Ni<sub>3</sub>S<sub>2</sub>, L2@Ni<sub>3</sub>S<sub>2</sub> and L3@Ni<sub>3</sub>S<sub>2</sub> at 5mA cm<sup>-2</sup>.

Table S1 The mass of ITO, Ni<sub>3</sub>S<sub>2</sub> and the mass ratio (Ni<sub>3</sub>S<sub>2</sub>/ITO) of the CF@ITO@Ni<sub>3</sub>S<sub>2</sub> with different electrodeposition cycles based on L2 samples. The areal capacitances, Gravimetric capacitance based on Ni<sub>3</sub>S<sub>2</sub> mass and Gravimetric capacitance based on Ni<sub>3</sub>S<sub>2</sub>/ITO mass of the CF@ITO@Ni<sub>3</sub>S<sub>2</sub> with different electrodeposition cycles based on L2 samples.

| CF@ITO@Ni <sub>3</sub> S <sub>2</sub><br>2 | ITO<br>(mg cm <sup>-2</sup> ) | Ni <sub>3</sub> S <sub>2</sub><br>(mg cm <sup>-2</sup> ) | Ni <sub>3</sub> S <sub>2</sub> /<br>ITO<br>mass<br>ratio | Areal<br>capacitance<br>(F cm <sup>-2</sup> ) | Gravimetric<br>capacitance<br>based on Ni <sub>3</sub> S <sub>2</sub><br>(F g <sup>-1</sup> ) | Gravimetric<br>capacitance<br>based on<br>Ni <sub>3</sub> S <sub>2</sub> /ITO<br>(F g <sup>-1</sup> ) |
|--------------------------------------------|-------------------------------|----------------------------------------------------------|----------------------------------------------------------|-----------------------------------------------|-----------------------------------------------------------------------------------------------|-------------------------------------------------------------------------------------------------------|
| 1 cyc                                      | 2.90                          | 0.77                                                     | 0.266                                                    | 978.60                                        | 1270.90                                                                                       | 266.89                                                                                                |
| 2 cyc                                      | 2.90                          | 0.96                                                     | 0.331                                                    | 1790.40                                       | 1865.00                                                                                       | 464.39                                                                                                |
| 3 cyc                                      | 2.90                          | 1.60                                                     | 0.552                                                    | 2505.40                                       | 1565.88                                                                                       | 557.45                                                                                                |
| 4 cyc                                      | 2.90                          | 2.22                                                     | 0.766                                                    | 2829.00                                       | 1274.32                                                                                       | 553.05                                                                                                |
| 5 cyc                                      | 2.90                          | 4.12                                                     | 1.421                                                    | 3846.40                                       | 933.59                                                                                        | 548.02                                                                                                |

Table S2 The mass of Ni<sub>3</sub>S<sub>2</sub> and the areal capacitances, Gravimetric capacitance based on Ni<sub>3</sub>S<sub>2</sub> for CF@Ni<sub>3</sub>S<sub>2</sub> electrodes with different electrodeposition cycles.

| CF@Ni <sub>3</sub> S <sub>2</sub> | Ni <sub>3</sub> S <sub>2</sub><br>(mg cm <sup>-2</sup> ) | Areal<br>capacitance<br>(mF cm <sup>-2</sup> ) | Gravimetric<br>capacitance<br>based on Ni <sub>3</sub> S <sub>2</sub> (F g <sup>-1</sup> ) |
|-----------------------------------|----------------------------------------------------------|------------------------------------------------|--------------------------------------------------------------------------------------------|
| 1 cycle                           | 0.15                                                     | 95.00                                          | 633.33                                                                                     |
| 2 cycle                           | 0.42                                                     | 355.00                                         | 845.23                                                                                     |
| 3 cycle                           | 1.07                                                     | 744.00                                         | 695.33                                                                                     |

Table S3 The fitted parameters of the EIS data.

|                                              | Rs (Ω) | Rct (Ω) | Q1 (F)   | n1     | Q2 (F) | n2     |
|----------------------------------------------|--------|---------|----------|--------|--------|--------|
| CF@ITO@Ni <sub>3</sub> S <sub>2</sub> -1cyc  | 0.4036 | 1.668   | 0.001963 | 0.5159 | 0.0251 | 0.9192 |
| CF@ITO@ Ni <sub>3</sub> S <sub>2</sub> -2cyc | 0.3949 | 2.036   | 0.000929 | 0.5568 | 0.5576 | 0.8116 |
| CF@ITO@ Ni <sub>3</sub> S <sub>2</sub> -3cyc | 0.2566 | 2.026   | 0.001406 | 0.4812 | 0.6142 | 0.7634 |
| CF@ITO@ Ni <sub>3</sub> S <sub>2</sub> -4cyc | 0.5987 | 1.434   | 0.006358 | 0.4146 | 0.9015 | 0.7962 |
| CF@ITO@ Ni <sub>3</sub> S <sub>2</sub> -5cyc | 0.6344 | 1.715   | 0.004585 | 0.4479 | 0.9997 | 0.6741 |
| CF@ Ni <sub>3</sub> S <sub>2</sub> -1cyc     | 0.8057 | 0.267   | 0.000886 | 0.7955 | 0.0694 | 0.8868 |
| CF@ Ni <sub>3</sub> S <sub>2</sub> -3cyc     | 0.9092 | 0.318   | 0.004693 | 0.5427 | 0.1315 | 0.8631 |
| CF@ Ni <sub>3</sub> S <sub>2</sub> -5cyc     | 0.9155 | 0.273   | 0.003719 | 0.6074 | 0.3764 | 0.7566 |

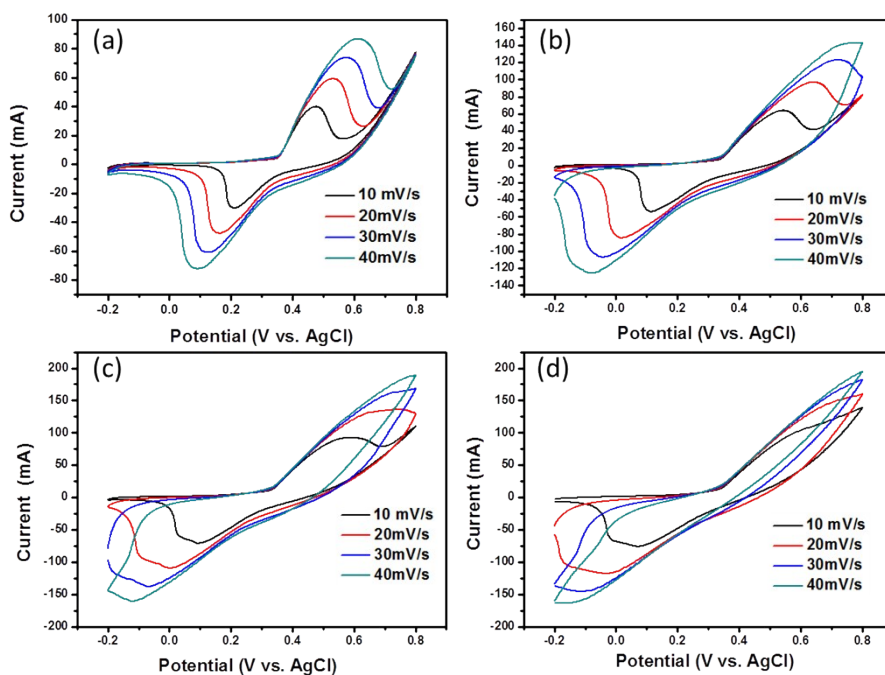

Fig. S5 (a) CV curves as a function of different scan rate for the CF@ITO@Ni<sub>3</sub>S<sub>2</sub> electrodes electrodeposited with 1, 3, 4, 5 cycles.

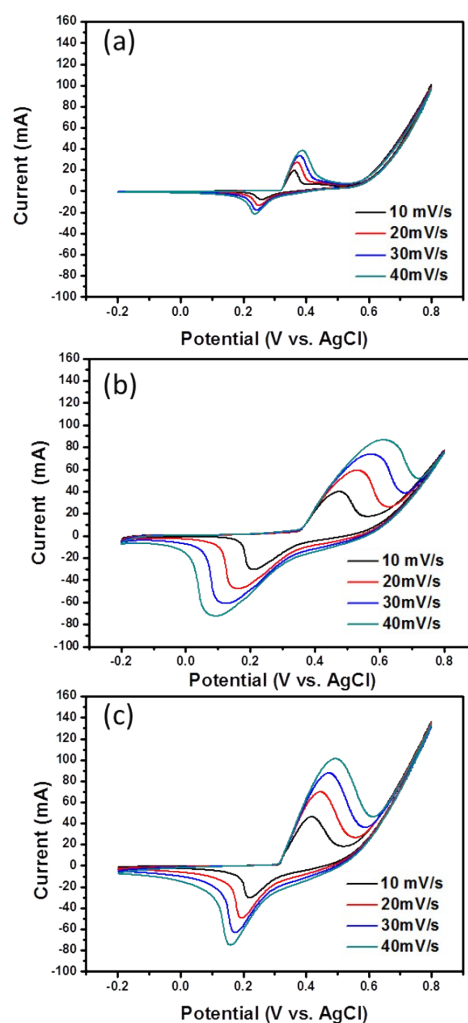

**Fig. S6** CV curves as a function of different scan rate for the CF @Ni<sub>3</sub>S<sub>2</sub> electrodes electrodeposited with 1, 3, 5 cycles.

Table S4 The Gravimetric capacitance based on Ni<sub>3</sub>S<sub>2</sub> for all samples with L2 as a function of different current densities.

| Current density (mA cm <sup>-2</sup> ) | Gravimetric capacitance based on Ni <sub>3</sub> S <sub>2</sub> (F g <sup>-1</sup> ) |                                         |                                         |                                             |                                             |                                             |                                             |                                             |
|----------------------------------------|--------------------------------------------------------------------------------------|-----------------------------------------|-----------------------------------------|---------------------------------------------|---------------------------------------------|---------------------------------------------|---------------------------------------------|---------------------------------------------|
|                                        | CF@Ni <sub>3</sub> S <sub>2</sub> -1cyc                                              | CF@Ni <sub>3</sub> S <sub>2</sub> -3cyc | CF@Ni <sub>3</sub> S <sub>2</sub> -5cyc | CF@ITO@Ni <sub>3</sub> S <sub>2</sub> -1cyc | CF@ITO@Ni <sub>3</sub> S <sub>2</sub> -2cyc | CF@ITO@Ni <sub>3</sub> S <sub>2</sub> -3cyc | CF@ITO@Ni <sub>3</sub> S <sub>2</sub> -4cyc | CF@ITO@Ni <sub>3</sub> S <sub>2</sub> -5cyc |
| 2                                      | 693.33                                                                               | 902.40                                  | 823.38                                  | 1239.25                                     | 1727.99                                     | 1514.10                                     | 1267.49                                     | 960.44                                      |
| 5                                      | 633.33                                                                               | 852.00                                  | 697.08                                  | 1266.42                                     | 1865.00                                     | 1563.65                                     | 1276.24                                     | 980.00                                      |
| 8                                      | 586.67                                                                               | 801.60                                  | 679.09                                  | 1253.95                                     | 1749.06                                     | 1544.81                                     | 1201.81                                     | 950.49                                      |
| 10                                     | 560.00                                                                               | 784.81                                  | 671.60                                  | 1212.59                                     | 1700.05                                     | 1502.74                                     | 1162.29                                     | 933.69                                      |
| 20                                     | 504.00                                                                               | 700.80                                  | 592.89                                  | 1154.35                                     | 1599.80                                     | 1419.48                                     | 1072.96                                     | 864.10                                      |
| 30                                     | 452.00                                                                               | 619.20                                  | 528.43                                  | 1084.73                                     | 1518.05                                     | 1318.88                                     | 959.01                                      | 777.98                                      |
| 40                                     | --                                                                                   | 576.00                                  | 479.71                                  | 1038.40                                     | 1430.01                                     | 1256.22                                     | 828.63                                      | --                                          |

|    |    |        |        |        |         |         |    |    |
|----|----|--------|--------|--------|---------|---------|----|----|
| 50 | -- | 552.00 | 430.99 | 960.24 | 1372.00 | 1174.58 | -- | -- |
|----|----|--------|--------|--------|---------|---------|----|----|

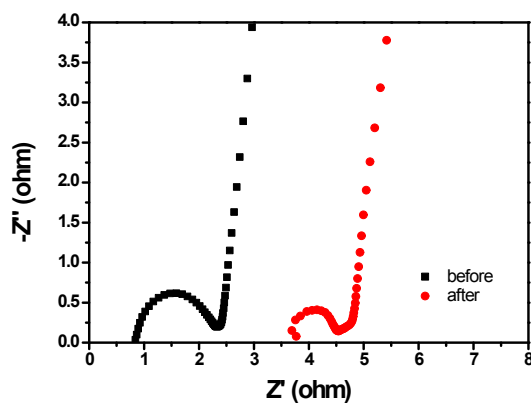

**Fig. S7** The EIS curves of the CF@ITO@Ni<sub>3</sub>S<sub>2</sub> electrodes before and after the cyclic stability.

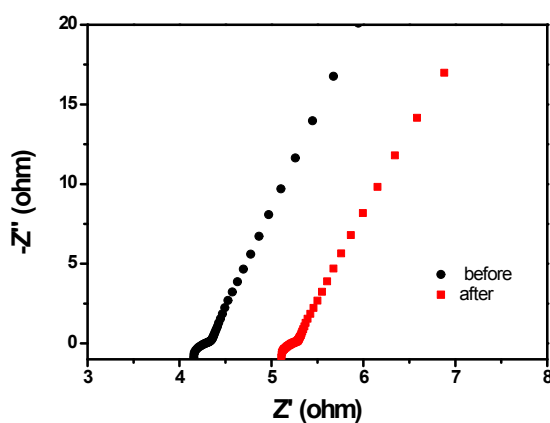

**Fig. S8** The EIS curves of the CF@ITO@Ni<sub>3</sub>S<sub>2</sub> symmetric device before and after the cyclic stability.

**Table S5** The fitted parameters of the EIS data for the CF@ITO@Ni<sub>3</sub>S<sub>2</sub> electrode and symmetric device before and after cyclic stability.

|                                   | Rs (ohm) | Rct (ohm) | Q1 (F) | n1   | Q2 (F) | n2   |
|-----------------------------------|----------|-----------|--------|------|--------|------|
| Electrode before cyclic stability | 0.88     | 1.41      | 4.7E-6 | 0.92 | 0.0030 | 0.88 |
| Electrode after cyclic stability  | 3.67     | 1.01      | 1.7E-5 | 0.79 | 0.0020 | 0.88 |
| Device before cyclic stability    | 4.32     | 6730      | 8.4E-4 | 0.97 | 0.018  | 0.92 |
| Device after cyclic stability     | 5.27     | 1079      | 1.4E-3 | 0.95 | 0.015  | 1.3  |
